# Supplementary figures and images for: An attempt to achieve the direct hydrogenolysis of tetrahydrofurfuryl alcohol in supercritical carbon dioxide
Source: Royal Society of Chemistry journal article supplement (doi:10.1039/c1cy00125f), 2011-01-01

## Supporting information

Figure 2S-1

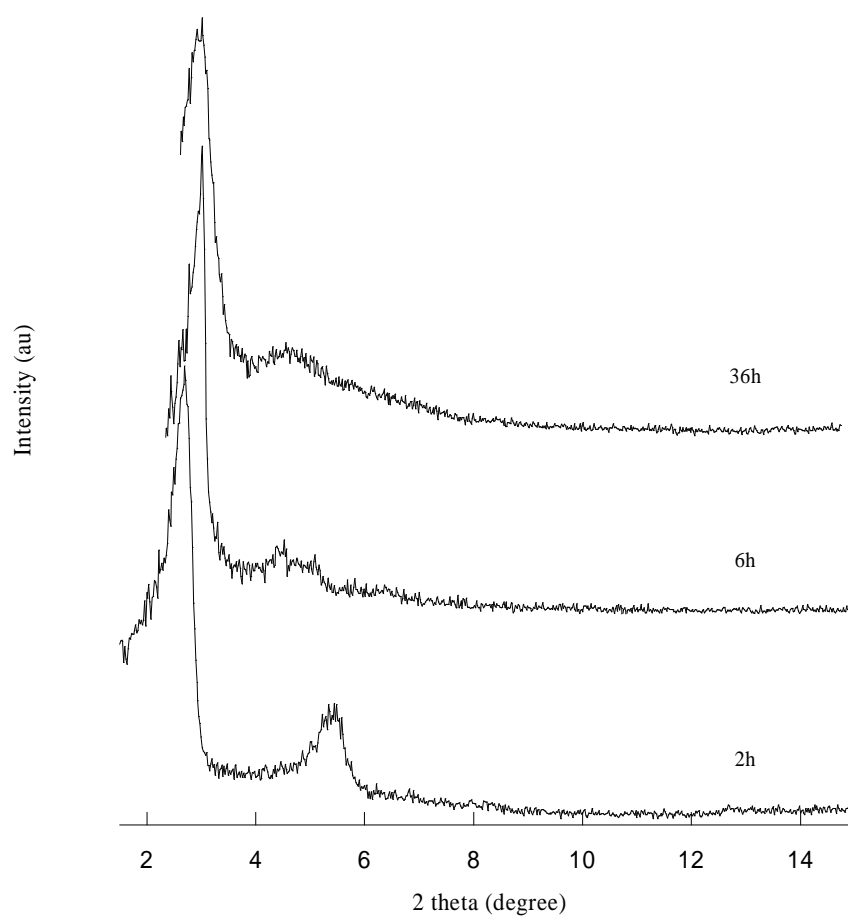

Figure 2S-2

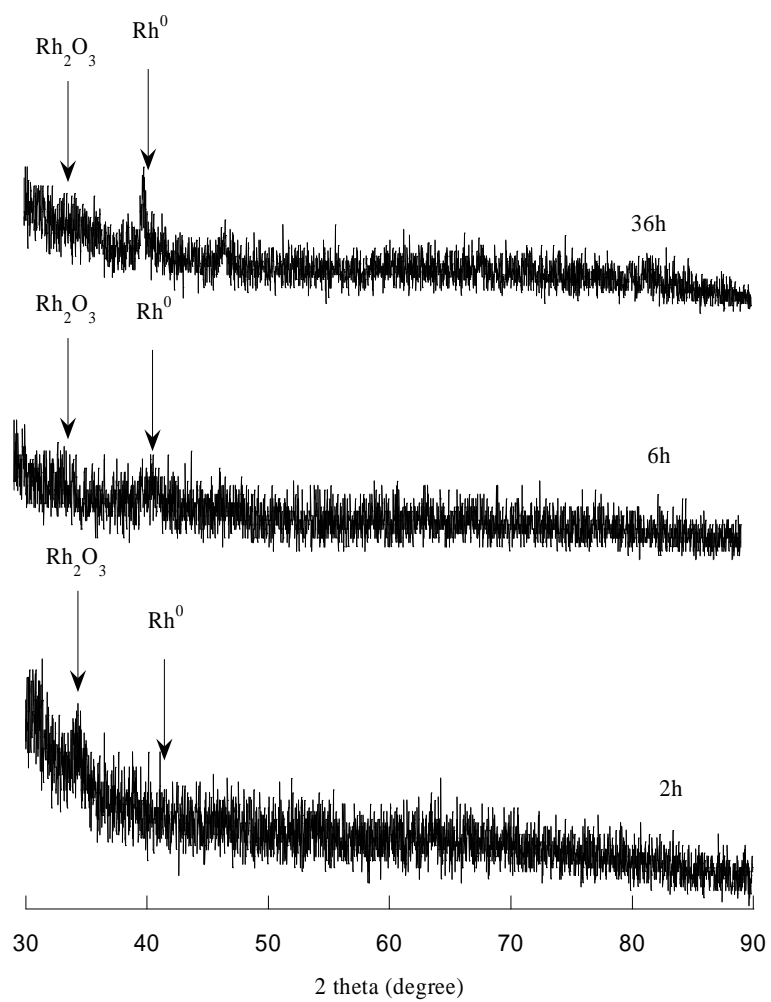

Supplement: c1cy00125f.pdf [file c1cy00125f.pdf]
